# Acute Myeloid Leukemia or Myelodysplastic Syndrome Following Use of Granulocyte Colony-Stimulating Factors During Breast Cancer Adjuvant Chemotherapy

Dawn Hershman, Alfred I. Neugut, Judith S. Jacobson, Jian Wang, Wei-Yann Tsai, Russell McBride, Charles L. Bennett, Victor R. Grann

- Background** Recently, increasing numbers of women receiving adjuvant chemotherapy for breast cancer have also received granulocyte colony-stimulating factors (G-CSFs) or granulocyte-macrophage colony-stimulating factors (GM-CSFs). Although these growth factors support chemotherapy, their long-term safety has not been evaluated. We studied the association between G-CSF use and incidence of leukemia in a population-based sample of breast cancer patients.
- Methods** Among women aged 65 years or older in the Surveillance, Epidemiology, and End Results–Medicare database who were diagnosed with stages I–III breast cancer from January 1, 1991, to December 31, 1999, we identified those who received G-CSF or GM-CSF concurrently with chemotherapy. We used Cox proportional hazards models to estimate hazard ratios for the association of treatment with G-CSF or GM-CSF and subsequent (through December 31, 2003) diagnosis of acute myeloid leukemia (AML) or myelodysplastic syndrome (MDS). All statistical tests were two-sided.
- Results** Of 5510 women treated with chemotherapy, 906 (16%) received G-CSF or GM-CSF therapy, and 64 (1.16%) were subsequently diagnosed with either MDS or AML before a cancer recurrence. Use of G-CSF and GM-CSF was associated with more recent diagnosis, younger age, urban residence, fewer comorbidities, receipt of radiation therapy, positive lymph nodes, and cyclophosphamide treatment. Of the 906 patients who were treated with G-CSF, 16 (1.77%) developed AML or MDS; of the 4604 patients not treated with G-CSF, 48 (1.04%) developed AML or MDS. The hazard rate ratio for AML or MDS among those treated with G-CSF or GM-CSF compared with those who were not was 2.14 (95% confidence interval [CI] = 1.12 to 4.08). AML or MDS developed within 48 months of breast cancer diagnosis in 1.8% of patients who received G-CSF or GM-CSF but only in 0.7% of patients who did not (hazard ratio = 2.59, 95% CI = 1.30 to 5.15).
- Conclusions** The use of G-CSF was associated with a doubling in the risk of subsequent AML or MDS among the population that we studied, although the absolute risk remained low. Even if this association is confirmed, the benefits of G-CSF may still outweigh the risks. Meanwhile, however, G-CSF use should not be assumed to be risk free.

J Natl Cancer Inst 2007;99:196–205

A number of cytokines have been used in the past two decades to reduce the complications of neutropenia for patients who receive chemotherapy (1–6). The hematopoietic colony-stimulating factors were approved by the US Food and Drug Administration in 1991 and are increasingly used among breast cancer patients (7). The prophylactic use of granulocyte colony-stimulating factors (G-CSFs) has been shown to reduce the need for chemotherapy dose reductions and delays due to myelosuppression that may limit chemotherapy dose intensity, thereby increasing the potential for prolonged disease-free and overall survival in the curative setting (8). G-CSFs have also been administered to healthy donors who undergo peripheral stem cell mobilization procedures as part of allogeneic peripheral blood transfusions.

In the early years of the use of G-CSFs and granulocyte-macrophage colony-stimulating factors (GM-CSFs) to treat

**Affiliations of authors:** Department of Medicine and Herbert Irving Comprehensive Cancer Center, College of Physicians and Surgeons (DH, AIN, VRG), and Departments of Epidemiology and Biostatistics, Mailman School of Public Health (DH, AIN, JSJ, JW, WYT, RM, VRG), Columbia University, New York, NY, Department of Statistics, National Cheng Kung University, Taiwan (WYT); Veterans Affairs Midwest Center for Health Services and Policy Research, Jesse Brown Veterans Affairs Medical Center (CLB); Division of Hematology and Oncology, Department of Medicine, and Robert H. Lurie Comprehensive Cancer Center, Northwestern University Feinberg School of Medicine, Chicago, IL (CLB).

**Correspondence to:** Dawn Hershman, MD, MS, Herbert Irving Comprehensive Cancer Center, 161 Ft Washington Ave., Rm. 1068, New York, NY 10032 (e-mail: dlh23@columbia.edu).

See “Notes” following “References.”

**DOI:** 10.1093/jnci/djk028

© The Author 2007. Published by Oxford University Press. All rights reserved. For Permissions, please e-mail: journals.permissions@oxfordjournals.org.

malignancies, the possibility was raised that these cytokines might induce acute myeloid leukemia (AML) (9). Chemotherapy given for a specific cancer may induce otherwise lethal mutations in a myeloid stem cell or progenitor cell, but the antiapoptotic effect of G-CSF or GM-CSF saves the mutant cell from destruction, thereby permitting it to develop into a myeloid cancer (10). In addition, it has been shown that *de novo* DNA synthesis in the white blood cell population of healthy donors increased with G-CSF administration but returned to baseline levels 6 weeks after completion of therapy (11). Using a combined multiparametric cell-scanning system to assess the effects of G-CSF administration to normal donors, Kaplinsky et al. (12) demonstrated that up to 0.6% of myeloid cells, but not purified CD34<sup>+</sup> stem progenitor cells, became tetraploid, indicating that G-CSF may induce alterations of chromosomal numbers in small subsets of mature myeloid cells in G-CSF–mobilized normal donors.

In 2003, a study of 412 children treated on two consecutive acute lymphocytic leukemia (ALL) protocols from 1991 to 1998 found that patients who had been treated with topoisomerase II inhibitors and G-CSF had a higher risk of developing myeloid leukemia after therapy than other patients (13). Later that year, using pooled data from six clinical trials, the National Surgical Adjuvant Breast and Bowel Project (NSABP) reported on the 5-year cumulative incidence of leukemia (43 case subjects) among 8563 patients with operable breast cancer who had received adjuvant doxorubicin and cyclophosphamide (14). The incidence of leukemia in the six trials ranged from 0.3% to 1.2%. Higher risk was associated with greater dose intensity and with the receipt of radiation therapy. Of the 1694 subjects assigned to trials that included treatment with G-CSF, 18 subjects (1.0%) developed either AML or myelodysplastic syndrome (MDS), and higher doses of G-CSF were associated with higher risks of AML and MDS. The relative risk of AML or MDS among patients treated with G-CSF who did not develop recurrent breast cancer was 2.34 (95% confidence interval [CI] = 0.72 to 7.55), but, due to the small sample size, this association was not statistically significant; it was reported as hypothesis generating (14). Excess AML and MDS have also been reported among children with acute lymphocytic leukemia treated with G-CSF (13), among patients with severe chronic neutropenia treated with G-CSF (15–17), among breast cancer patients treated with G-CSF (18), and even in healthy donors after G-CSF stimulation for a peripheral blood stem cell harvest (19,20). However, the association has not been found consistently, and strong evidence for causality is lacking (8,21,22).

Adjuvant chemotherapy for early-stage breast cancer has substantially increased the number of long-term breast cancer survivors (23). As a result, it is increasingly necessary to weigh the survival benefits of treatments against the risks of delayed toxicity that these treatments may entail. We therefore analyzed the association of G-CSF and GM-CSF with second primary AML or MDS among women treated with adjuvant chemotherapy for early-stage breast cancer.

## Patients and Methods

### Study Database

We used a database that was codeveloped by the US National Cancer Institute (NCI) and the Centers for Medicare and Medicaid

---

## CONTEXT AND CAVEATS

### Prior knowledge

The cytokines granulocyte colony-stimulating factors (G-CSFs) and granulocyte macrophage colony stimulating factors (GM-CSFs) are used increasingly to avoid the myelosuppressive effects that would otherwise limit the chemotherapy dose in women with breast cancer. However, *in vitro* and epidemiologic evidence suggests that these cytokines may increase the risk of acute myelocytic leukemia (AML) or myelodysplastic syndrome (MDS).

### Study design

Women included in a SEER–Medicare population-based database who received G-CSF or GM-CSF concurrently with chemotherapy for breast cancer were followed for the subsequent development of AML or MDS.

### Contribution

Women with breast cancer who received either cytokine concurrently with chemotherapy had about a 2% risk of developing AML or MDS, whereas women who received chemotherapy alone had a subsequent AML or MDS risk of about 1%.

### Implications

G-CSF and GM-CSF support may be associated with an increase in the risk of subsequent AML or MDS. However, the absolute risk was low, and the benefits may still outweigh any risks.

### Limitations

The database includes only women 65 years of age and older, so the findings may not be generalizable to younger women. The claims data in the SEER–Medicare database may be incomplete. Information on dose and dose intensity was not available for individual women, and differences could have confounded the analysis. Additional studies will be required to determine whether the association is causal.

---

Services (CMS). The Surveillance, Epidemiology, and End Results (SEER) program, sponsored by NCI, is a network of tumor registries covering a growing proportion of the US population (14% during the period of this analysis). The CMS-sponsored Medicare program covers hospital services, physician services, and some drug therapy for more than 97% of persons aged 65 years and older. The linked SEER–Medicare database contains clinical, demographic, and medical claims data on patients aged 65 years and older who have been diagnosed with cancer since 1990. This unique population-based, longitudinal database has been described comprehensively elsewhere (24).

### Patient Selection Criteria

We conducted a retrospective cohort study of women, aged 65 years or older and participating in Medicare, who were diagnosed with breast cancer from January 1, 1991, through December 31, 1999, and received chemotherapy within 12 months of their diagnosis. We excluded women who were enrolled in a health maintenance organization during any month of the study period because data were unavailable for these periods; women who did not participate in both Medicare Parts A and B during any month of the study period because data were partially unavailable; women diagnosed with American Joint Committee on Cancer

**Table 1.** Baseline characteristics of breast cancer chemotherapy recipients by G-CSF status\*

| Variable                               | Treated with G-CSF |      |               |      |                  |      | P value† |
|----------------------------------------|--------------------|------|---------------|------|------------------|------|----------|
|                                        | Yes (N = 906)      |      | No (N = 4604) |      | Total (N = 5510) |      |          |
|                                        | N                  | %    | N             | %    | N                | %    |          |
| <b>Year of diagnosis</b>               |                    |      |               |      |                  |      | <.0001   |
| 1991                                   | 0                  | 0.0  | 465           | 10.1 | 465              | 8.4  |          |
| 1992                                   | 0                  | 0.0  | 566           | 12.3 | 566              | 10.3 |          |
| 1993                                   | 36                 | 4.0  | 465           | 10.1 | 501              | 9.1  |          |
| 1994                                   | 86                 | 9.5  | 447           | 9.7  | 533              | 9.7  |          |
| 1995                                   | 96                 | 10.6 | 454           | 9.9  | 550              | 10.0 |          |
| 1996                                   | 119                | 13.1 | 423           | 9.2  | 542              | 9.8  |          |
| 1997                                   | 141                | 15.6 | 535           | 11.6 | 676              | 12.3 |          |
| 1998                                   | 188                | 20.8 | 640           | 13.9 | 828              | 15.0 |          |
| 1999                                   | 240                | 26.5 | 609           | 13.2 | 849              | 15.4 |          |
| <b>Age at diagnosis (y)</b>            |                    |      |               |      |                  |      | .002     |
| 65–69                                  | 348                | 38.4 | 1724          | 37.4 | 2072             | 37.6 |          |
| 70–74                                  | 329                | 36.3 | 1580          | 34.3 | 1909             | 34.6 |          |
| 75–79                                  | 178                | 19.6 | 896           | 19.5 | 1074             | 19.5 |          |
| 80–85                                  | 48                 | 5.3  | 302           | 6.6  | 350              | 6.4  |          |
| >85                                    | 3                  | 0.3  | 102           | 2.2  | 105              | 1.9  |          |
| <b>Race/ethnicity</b>                  |                    |      |               |      |                  |      | .30      |
| White                                  | 817                | 90.2 | 4072          | 88.4 | 4889             | 88.7 |          |
| Black                                  | 43                 | 4.7  | 269           | 5.8  | 312              | 5.7  |          |
| Other                                  | 46                 | 5.1  | 263           | 5.7  | 309              | 5.6  |          |
| <b>Marital status</b>                  |                    |      |               |      |                  |      | .08      |
| Married                                | 407                | 44.9 | 2177          | 47.3 | 2584             | 46.9 |          |
| Other                                  | 489                | 54.0 | 2339          | 50.8 | 2828             | 51.3 |          |
| Unknown                                | 10                 | 1.1  | 88            | 1.9  | 98               | 1.8  |          |
| <b>AJCC breast cancer stage‡</b>       |                    |      |               |      |                  |      | <.0001   |
| I                                      | 129                | 14.2 | 1054          | 22.9 | 1183             | 21.5 |          |
| II                                     | 568                | 62.7 | 2840          | 61.7 | 3408             | 61.9 |          |
| III                                    | 209                | 23.1 | 710           | 15.4 | 919              | 16.7 |          |
| <b>Hormone receptor status</b>         |                    |      |               |      |                  |      | .15      |
| ER+ or PR+                             | 381                | 42.1 | 2059          | 44.7 | 2440             | 44.3 |          |
| ER–/PR–                                | 376                | 41.5 | 1891          | 41.1 | 2267             | 41.1 |          |
| Unknown                                | 149                | 16.4 | 654           | 14.2 | 803              | 14.6 |          |
| <b>Tumor size (cm)</b>                 |                    |      |               |      |                  |      | .006     |
| <2                                     | 315                | 34.8 | 1701          | 36.9 | 2016             | 36.6 |          |
| 2–5                                    | 431                | 47.6 | 2262          | 49.1 | 2693             | 48.9 |          |
| >5                                     | 129                | 14.2 | 472           | 10.3 | 601              | 10.9 |          |
| Unknown                                | 31                 | 3.4  | 169           | 3.7  | 200              | 3.6  |          |
| <b>Positive lymph nodes</b>            |                    |      |               |      |                  |      | <.0001   |
| 0                                      | 206                | 22.7 | 1521          | 33.0 | 1727             | 31.3 |          |
| 1–3                                    | 293                | 32.3 | 1317          | 28.6 | 1610             | 29.2 |          |
| ≥4                                     | 406                | 44.8 | 1763          | 38.3 | 2169             | 39.4 |          |
| Unknown                                | 1                  | 0.1  | 3             | 0.1  | 4                | 0.1  |          |
| <b>Comorbidity score</b>               |                    |      |               |      |                  |      | .02      |
| 0                                      | 691                | 76.3 | 3630          | 78.8 | 4321             | 78.4 |          |
| 1                                      | 175                | 19.3 | 727           | 15.8 | 902              | 16.4 |          |
| ≥2                                     | 40                 | 4.4  | 247           | 5.4  | 287              | 5.2  |          |
| <b>Treated with</b>                    |                    |      |               |      |                  |      | <.0001   |
| Radiation                              | 565                | 62.4 | 2300          | 50.0 | 2865             | 52.0 |          |
| Doxorubicin                            | 521                | 57.5 | 1066          | 23.2 | 1587             | 28.8 | <.0001   |
| Cyclophosphamide                       | 781                | 86.2 | 2589          | 56.2 | 3370             | 61.2 | <.0001   |
| <b>Duration of chemotherapy (days)</b> |                    |      |               |      |                  |      | <.001    |
| <90                                    | 245                | 27.0 | 1575          | 34.2 | 1820             | 33.0 |          |
| 90–180                                 | 433                | 47.8 | 2124          | 46.1 | 2557             | 46.4 |          |
| >180                                   | 228                | 25.2 | 905           | 19.7 | 1133             | 20.6 |          |
| <b>Urban residence</b>                 |                    |      |               |      |                  |      | <.0001   |
| Yes                                    | 865                | 95.5 | 4069          | 88.4 | 4934             | 89.5 |          |
| No                                     | 41                 | 0.5  | 535           | 11.6 | 576              | 10.5 |          |

(Table continues)

Downloaded from https://academic.oup.com/jnci/article/99/3/196/2522208 by guest on 25 April 2024

**Table 1 (continued).**

| Variable          | Treated with G-CSF |      |               |      |                  |      | P value† |
|-------------------|--------------------|------|---------------|------|------------------|------|----------|
|                   | Yes (N = 906)      |      | No (N = 4604) |      | Total (N = 5510) |      |          |
|                   | N                  | %    | N             | %    | N                | %    |          |
| Teaching hospital |                    |      |               |      |                  |      | .69      |
| Yes               | 758                | 83.7 | 3876          | 84.2 | 4634             | 84.1 |          |
| No                | 148                | 16.3 | 728           | 15.8 | 876              | 15.9 |          |

\* G-CSF = granulocyte colony-stimulating factor; AJCC = American Joint Committee on Cancer; ER = estrogen receptor; PR = progesterone receptor.

† All hypothesis tests are two-sided chi-square and *t* tests.

‡ AJCC staging (25).

(AJCC) stage 0 or stage IV disease (25) because our evaluation was focused on adjuvant treatment; women who had end-stage renal disease; women who died or were censored within 18 months of their diagnosis of breast cancer; women who had prior leukemia, MDS, or other cancer before their breast cancer diagnosis; and women who had lymphoid leukemia after their breast cancer diagnosis. For each patient, information was collected from 12 months before her breast cancer diagnosis to her death or censoring at December 31, 2003. Informed consent was not required for this study.

### Measurement of Treatments and Outcomes

Chemotherapy and radiation therapy exposure were ascertained from the Medicare files using codes of the International Classification of Diseases, 9th Revision, Clinical Modification (ICD-9-CM) Diagnosis, ICD-9-CM Procedural, Current Procedural Terminology, Healthcare Common Procedure Coding System (HCPCS), and revenue centers (26). We distinguished patients who received any cyclophosphamide or any doxorubicin from those who received other chemotherapy.

In addition, we used chemotherapy claims dates in Medicare data to determine which patients experienced a breast cancer relapse after their first series of chemotherapy treatments. Patients who had an interval between chemotherapy claims that was greater than 100 days were categorized as having a recurrence and were censored in the analysis at the time of recurrence to differentiate the effects of initial treatment from those of treatment for recurrent disease. Duration of chemotherapy exposure was calculated as months from first to last chemotherapy claim before recurrence. We calculated the follow-up interval as months from breast cancer diagnosis to the date of relapse, AML or MDS diagnosis, death, or end-of-study date, whichever came first.

We searched the linked Medicare file for HCPCS codes indicating treatment with G-CSF or GM-CSF. The HCPCS codes for G-CSF treatment are J1440 and J1441; the code for GM-CSF treatment is J2820. Both G-CSF and GM-CSF were included together as G-CSF in the analysis and will be referred to together as G-CSF. We used diagnosis codes in the Medicare files to identify leukemia and MDS outcomes. We searched for ICD-9 codes corresponding to the following diagnoses: myeloid leukemia (205.XX, v1062), monocytic leukemia (206.XX, v1063), and MDS (238.7). Patients who developed AML or MDS 18 months or longer after their diagnosis of breast cancer were counted as case subjects. To validate the MDS and AML claims data, we performed

a sensitivity analysis in which we included as case patients only those with two or more claims for MDS and/or AML.

### Comorbid Conditions

We searched the inpatient and outpatient Medicare data for diagnosis and procedure claims relevant to conditions identified by Charlson et al. (27) and included in the comorbidity index developed by Klabunde et al. (28). The Charlson scale is considered to be a reliable measure of comorbidity in cancer trials of older patients (29) and has been found to be predictive of hospitalization among breast cancer patients in the SEER–Medicare linked database (30). We used the comorbidity score and other demographic and clinical factors to control for baseline differences between groups in the multivariable analysis.

### Statistical Analysis

We used the chi-square test to compare subjects who did and did not receive G-CSF with respect to year of diagnosis; age (5-year groups) at diagnosis; race/ethnicity (white, black, other); location of residence (urban, nonurban); type of hospital (teaching, other); marital status (married, other); AJCC breast cancer stage; hormone receptor status (estrogen receptor [ER]–positive or progesterone receptor [PR]–positive, ER- and PR-negative, unknown); Charlson–Klabunde comorbidity score (0, 1, >1); receipt or non-receipt of radiation therapy, of doxorubicin, and of cyclophosphamide; tumor size (<2, 2–5, >5 cm); number of positive lymph nodes (0, 1–3, >3); duration of chemotherapy (<90, 90–180, >180 days); and AML and/or MDS claims. All hypothesis tests were two-sided. We used stratified analyses to test the main effect in treatment subgroups, to control for confounding, and to describe effect modification.

We used Cox proportional hazards modeling to analyze the association between diagnosis of AML or MDS and G-CSF treatment, controlling for all covariates and stratifying by year of diagnosis. Follow-up time was defined as months from breast cancer diagnosis to AML or MDS diagnosis for AML or MDS patients and as the date of relapse, death, or end-of-study date, whichever came first, for patients who were not diagnosed with AML or MDS. Separate models were created stratifying on year of breast cancer diagnosis only, controlling for clinical variables (age, hormone receptor status, comorbidity, radiation, chemotherapy, stage, and duration of chemotherapy), and controlling for clinical variables as well as demographic variables (race, geographic location, diagnosis in a teaching hospital, and marital status).

**Table 2.** Baseline characteristics of breast cancer patients undergoing chemotherapy and risk of subsequent AML and MDS\*

| Variable                                  | AML or MDS<br>(N = 64; 1.16%) |      | No AML or MDS<br>(N = 5446; 98.84%) |      | P value† | All chemotherapy<br>(N = 5510) |      |
|-------------------------------------------|-------------------------------|------|-------------------------------------|------|----------|--------------------------------|------|
|                                           | N                             | %    | N                                   | %    |          | N                              | %    |
| <b>Year of breast cancer diagnosis‡</b>   |                               |      |                                     |      |          |                                |      |
| 1991                                      | 8                             | 12.5 | 457                                 | 8.4  | .05      | 465                            | 8.4  |
| 1992                                      | 4                             | 6.2  | 562                                 | 10.3 |          | 566                            | 10.3 |
| 1993                                      | 12                            | 18.7 | 489                                 | 9.0  |          | 501                            | 9.1  |
| 1994                                      | 8                             | 12.5 | 525                                 | 9.6  |          | 533                            | 9.7  |
| 1995                                      | 8                             | 12.5 | 542                                 | 9.9  |          | 550                            | 10.0 |
| 1996                                      | 8                             | 12.5 | 534                                 | 9.8  |          | 542                            | 9.8  |
| 1997                                      | 6                             | 9.4  | 670                                 | 12.3 |          | 676                            | 12.3 |
| 1998                                      | 6                             | 9.4  | 822                                 | 15.1 |          | 828                            | 15.0 |
| 1999                                      | 4                             | 6.2  | 845                                 | 15.5 |          | 849                            | 15.4 |
| <b>Age at breast cancer diagnosis (y)</b> |                               |      |                                     |      |          |                                |      |
| Mean                                      | 71.2                          | 32.8 | 72.0                                | 37.7 | .65      | 72.1                           | 37.6 |
| 65–69                                     | 21                            | 32.8 | 2051                                | 37.7 | .89      | 2072                           | 37.6 |
| 70–74                                     | 26                            | 40.6 | 1883                                | 34.6 |          | 1909                           | 34.6 |
| 75–79                                     | 12                            | 18.7 | 1062                                | 19.5 |          | 1074                           | 19.5 |
| 80–85                                     | 4                             | 6.2  | 346                                 | 6.3  |          | 350                            | 6.3  |
| >85                                       | 1                             | 1.6  | 104                                 | 1.9  |          | 105                            | 1.9  |
| <b>Race/ethnicity</b>                     |                               |      |                                     |      |          |                                |      |
| White                                     | 58                            | 90.6 | 4831                                | 88.7 | .28      | 4889                           | 88.7 |
| Black                                     | 1                             | 1.6  | 311                                 | 5.7  |          | 312                            | 5.7  |
| Other                                     | 5                             | 7.8  | 304                                 | 5.6  |          | 309                            | 5.6  |
| <b>Urban residence</b>                    |                               |      |                                     |      |          |                                |      |
| No                                        | 4                             | 6.2  | 572                                 | 10.5 |          | 576                            | 10.4 |
| Yes                                       | 60                            | 93.7 | 4874                                | 89.5 | .27      | 4934                           | 89.5 |
| <b>Teaching hospital</b>                  |                               |      |                                     |      |          |                                |      |
| No                                        | 50                            | 78.1 | 4584                                | 84.2 | .19      | 4634                           | 84.1 |
| Yes                                       | 14                            | 21.9 | 862                                 | 15.8 |          | 876                            | 15.9 |
| <b>Married</b>                            |                               |      |                                     |      |          |                                |      |
| No                                        | 28                            | 43.7 | 2556                                | 46.9 | .86      | 2584                           | 46.9 |
| Yes                                       | 35                            | 54.7 | 2793                                | 51.3 |          | 2828                           | 51.3 |
| Unknown                                   | 1                             | 1.6  | 97                                  | 1.8  |          | 98                             | 1.8  |
| <b>AJCC stage</b>                         |                               |      |                                     |      |          |                                |      |
| Stage I                                   | 13                            | 20.3 | 1170                                | 21.5 | .60      | 1183                           | 21.5 |
| Stage II                                  | 43                            | 67.2 | 3365                                | 61.8 |          | 3408                           | 61.8 |
| Stage III                                 | 8                             | 12.5 | 911                                 | 16.7 |          | 919                            | 16.7 |
| <b>Hormone receptor status</b>            |                               |      |                                     |      |          |                                |      |
| ER+ or PR+                                | 32                            | 50.0 | 2408                                | 44.2 | .25      | 2440                           | 44.3 |
| ER–/PR–                                   | 20                            | 31.2 | 2247                                | 41.3 |          | 2267                           | 41.1 |
| Unknown                                   | 12                            | 18.7 | 791                                 | 14.5 |          | 803                            | 14.6 |
| <b>Comorbidity score</b>                  |                               |      |                                     |      |          |                                |      |
| 0                                         | 49                            | 76.6 | 4272                                | 78.4 | .64      | 4321                           | 78.4 |
| 1                                         | 10                            | 15.6 | 892                                 | 16.4 |          | 902                            | 16.4 |
| ≥2                                        | 5                             | 7.8  | 282                                 | 5.2  |          | 287                            | 5.2  |
| <b>Radiation treatment</b>                |                               |      |                                     |      |          |                                |      |
| No                                        | 26                            | 40.6 | 2619                                | 48.1 | .23      | 2645                           | 48.0 |
| Yes                                       | 38                            | 59.4 | 2827                                | 51.9 |          | 2865                           | 52.0 |
| <b>Doxorubicin treatment</b>              |                               |      |                                     |      |          |                                |      |
| No                                        | 46                            | 71.9 | 3877                                | 71.2 | .90      | 3923                           | 71.2 |
| Yes                                       | 18                            | 28.1 | 1569                                | 28.8 |          | 1587                           | 28.8 |
| <b>Cyclophosphamide treatment</b>         |                               |      |                                     |      |          |                                |      |
| No                                        | 24                            | 37.5 | 2116                                | 38.8 | .82      | 2140                           | 38.8 |
| Yes                                       | 40                            | 62.5 | 3330                                | 61.1 |          | 3370                           | 61.2 |
| <b>G-CSF/GM-CSF treatment</b>             |                               |      |                                     |      |          |                                |      |
| No                                        | 48                            | 75.0 | 4556                                | 83.7 | .06      | 4604                           | 83.6 |
| Yes                                       | 16                            | 25.0 | 890                                 | 16.3 |          | 906                            | 16.4 |
| <b>Tumor size (cm)</b>                    |                               |      |                                     |      |          |                                |      |
| <2                                        | 22                            | 34.4 | 1994                                | 36.6 | .78      | 2016                           | 36.6 |
| 2–5                                       | 34                            | 53.1 | 2659                                | 48.8 |          | 2693                           | 48.9 |
| >5                                        | 5                             | 7.8  | 596                                 | 10.9 |          | 601                            | 10.9 |
| Unknown                                   | 3                             | 4.7  | 197                                 | 3.6  |          | 200                            | 3.6  |

(Table continues)

Downloaded from https://academic.oup.com/jnci/article/99/3/196/2522208 by guest on 25 April 2024



**Table 2 (continued).**

| Variable                        | AML or MDS<br>(N = 64; 1.16%) |      | No AML or MDS<br>(N = 5446; 98.84%) |      | P value† | All chemotherapy<br>(N = 5510) |      |
|---------------------------------|-------------------------------|------|-------------------------------------|------|----------|--------------------------------|------|
|                                 | N                             | %    | N                                   | %    |          | N                              | %    |
| Positive lymph nodes            |                               |      |                                     |      |          |                                |      |
| 0                               | 14                            | 21.9 | 1713                                | 31.4 | .21      | 1727                           | 31.3 |
| 1–3                             | 17                            | 26.6 | 1593                                | 29.2 |          | 1610                           | 29.2 |
| ≥4                              | 33                            | 51.6 | 2136                                | 39.2 |          | 2169                           | 39.4 |
| Unknown                         | 0                             | 0    | 4                                   | 0.07 |          | 4                              | 0.07 |
| Duration of chemotherapy (days) |                               |      |                                     |      |          |                                |      |
| <90                             | 22                            | 34.4 | 1798                                | 33.0 | .97      | 1820                           | 33.0 |
| 90–180                          | 29                            | 45.3 | 2528                                | 46.4 |          | 2557                           | 46.4 |
| >180                            | 3                             | 20.3 | 1120                                | 20.6 |          | 1133                           | 20.6 |

\* AML = acute myelogenous leukemia; MDS = myelodysplastic syndrome; AJCC = American Joint Committee on Cancer; ER = estrogen receptor; PR = progesterone receptor; G-CSF = granulocyte colony-stimulating factor; GM-CSF = granulocyte–macrophage colony-stimulating factor.

† All hypothesis tests are two-sided chi-square tests.

‡ Log-rank statistic,  $P = .16$ .

Using Cox proportional hazards models, we developed hazard rate ratios of AML or MDS events among patients who received G-CSF compared with other patients. Maximum partial likelihood estimates of hazard ratios (HRs) with 95% confidence intervals were obtained. The assumption of proportionality was confirmed visually. We generated Kaplan–Meier curves and applied the log-rank test to compare rates of AML and MDS across groups. Similarly, Cox proportional hazards models were developed to evaluate all-cause mortality. All statistical analyses were conducted using the SAS system for Windows Version 9.1.

## Results

The SEER–Medicare database included 5510 women aged 65 years and older who were diagnosed with histologically confirmed AJCC stages I–III breast cancer between January 1, 1991, and December 31, 1999, and who received chemotherapy within 12 months of diagnosis and met the other eligibility requirements. Among these women, 906 (16%) were treated with at least one course of G-CSF (N = 832), GM-CSF (N = 29), or both (N = 49) within 18 months of their breast cancer diagnosis. Use of these growth factors increased over time, from 0% to 26% of patients. Compared with patients who did not receive G-CSF or GM-CSF, those who received it were younger (mean age = 71 versus 72 years;  $P = .002$ ), more likely to have been diagnosed with advanced-stage breast cancer, more likely to live in an urban area, more likely to have had comorbid conditions, more likely to have undergone radiation therapy, more likely to have been treated with doxorubicin, more likely to have been treated with cyclophosphamide, and more likely to have received chemotherapy for more than 180 days (Table 1).

Among the 5510 patients, 64 (1.16%) developed AML or MDS at least 18 months after diagnosis. Year of diagnosis was the only variable that was associated in multivariable analysis with risk of AML or MDS, possibly because patients with longer follow-up had more opportunity to develop the outcome (Table 2). Of the 906 patients who were treated with G-CSF, 16 (1.77%) developed AML or MDS; of the 4604 patients not treated with G-CSF, 48 (1.04%) developed AML or MDS. Only one patient treated with GM-CSF developed leukemia. No other demographic, clinical, or

treatment-related factor was related to risk of AML or MDS (Table 2).

Cox proportional hazards models evaluating the association between G-CSF and AML or MDS are shown in Table 3. Because year of diagnosis was the only variable that was associated with subsequent diagnosis of AML or MDS (Table 2), we stratified by it in all the models. The hazard ratio for AML or MDS in patients stratified by year of diagnosis showed that the risk was twice as high among patients treated with G-CSF as among those not treated with G-CSF (HR = 2.24, 95% CI = 1.22 to 4.10). The risk of AML or MDS did not change substantially when clinical and treatment variables were added to the model (HR = 2.22, 95% CI = 1.17 to 4.22) or when clinical, treatment, and demographic variables were added (HR = 2.14, 95% CI = 1.12 to 4.08). The results were similar when the criterion for AML or MDS was more than one AML- or MDS-related claim. The hazard ratio for MDS associated with G-CSF treatment was 2.19 (95% CI = 1.1 to 4.5) and for AML associated with G-CSF treatment was 3.78 (95% CI = 1.4 to 10.5).

Figure 1 presents Kaplan–Meier incidence curves for the development of AML or MDS among patients treated with chemotherapy. The incidence curves for patients receiving and not receiving G-CSFs differed statistically significantly by the log-rank test ( $P = .02$ ).

We evaluated the association between G-CSF and survival using a Cox proportional hazards model. The hazard ratios for all-cause mortality were 0.94 (95% CI = 0.83 to 1.09) for those given G-CSF compared with those who were not and 1.94 (95% CI = 1.4 to 2.6) for those who developed AML or MDS as compared with those who did not, after adjusting for other confounding variables.

## Discussion

Our findings support the hypothesis that elderly women with breast cancer who receive G-CSF or GM-CSF as an adjunct to adjuvant chemotherapy are at increased risk of developing acute leukemia or MDS.

Two patterns of second primary leukemia incidence have been described following chemotherapy. Patients treated with alkylating

**Table 3.** Cox proportional hazards model results (as HRs with 95% CIs) for the association between baseline variables and occurrence of AML or MDS after breast cancer diagnosis\*

| Variable                               | Base model†         | Clinical variable–adjusted model‡ | Fully adjusted models§ |
|----------------------------------------|---------------------|-----------------------------------|------------------------|
| <b>G-CSF/GM-CSF treatment</b>          |                     |                                   |                        |
| No                                     | Referent            | Referent                          | Referent               |
| Yes                                    | 2.24 (1.22 to 4.10) | 2.22 (1.17 to 4.22)               | 2.14 (1.12 to 4.08)    |
| <b>Age category (y)</b>                |                     |                                   |                        |
| 65–69                                  |                     | Referent                          | Referent               |
| 70–74                                  |                     | 1.45 (0.81 to 2.60)               | 1.45 (0.81 to 2.60)    |
| 75–79                                  |                     | 1.32 (0.64 to 2.734)              | 1.32 (0.63 to 2.75)    |
| ≥80                                    |                     | 1.66 (0.60 to 4.60)               | 1.75 (0.62 to 4.90)    |
| <b>ER/PR status</b>                    |                     |                                   |                        |
| ER–/PR–                                |                     | Referent                          | Referent               |
| ER+ or PR+                             |                     | 1.32 (0.74 to 2.36)               | 1.30 (0.73 to 2.32)    |
| Unknown                                |                     | 1.46 (0.71 to 3.01)               | 1.41 (0.68 to 2.91)    |
| <b>Comorbidity score</b>               |                     |                                   |                        |
| None                                   |                     | Referent                          | Referent               |
| 1                                      |                     | 1.06 (0.53 to 2.11)               | 1.08 (0.54 to 2.15)    |
| ≥2                                     |                     | 1.97 (0.77 to 5.05)               | 2.09 (0.81 to 5.39)    |
| <b>Radiation treatment</b>             |                     |                                   |                        |
| No                                     |                     | Referent                          | Referent               |
| Yes                                    |                     | 1.55 (0.91 to 2.64)               | 1.50 (0.88 to 2.56)    |
| <b>Cyclophosphamide treatment</b>      |                     |                                   |                        |
| No                                     |                     | Referent                          | Referent               |
| Yes                                    |                     | 1.20 (0.67 to 2.15)               | 1.24 (0.69 to 2.24)    |
| <b>Doxorubicin treatment</b>           |                     |                                   |                        |
| No                                     |                     | Referent                          | Referent               |
| Yes                                    |                     | 0.86 (0.45 to 1.66)               | 0.87 (0.45 to 1.67)    |
| <b>Tumor size (cm)</b>                 |                     |                                   |                        |
| <2                                     |                     | Referent                          | Referent               |
| 2–5                                    |                     | 1.26 (0.73 to 2.18)               | 1.26 (0.73 to 2.182)   |
| >5                                     |                     | 0.81 (0.30 to 2.20)               | 0.83 (0.31 to 2.27)    |
| Unknown                                |                     | 1.28 (0.38 to 4.38)               | 1.36 (0.397 to 4.659)  |
| <b>Positive lymph nodes</b>            |                     |                                   |                        |
| 0                                      |                     | Referent                          | Referent               |
| 1–3                                    |                     | 1.20 (0.58 to 2.48)               | 1.15 (0.557 to 2.393)  |
| ≥4                                     |                     | 1.89 (0.96 to 3.7)                | 1.83 (0.920 to 3.631)  |
| <b>Duration of chemotherapy (days)</b> |                     |                                   |                        |
| <90                                    |                     | Referent                          | Referent               |
| 90–180                                 |                     | 0.77 (0.42 to 1.39)               | 0.76 (0.42 to 1.38)    |
| >180                                   |                     | 0.78 (0.38 to 1.60)               | 0.78 (0.38 to 1.61)    |
| <b>Race</b>                            |                     |                                   |                        |
| White                                  |                     |                                   | Referent               |
| Black                                  |                     |                                   | 0.30 (0.04 to 2.16)    |
| Other                                  |                     |                                   | 1.65 (0.65 to 4.16)    |
| <b>Geography</b>                       |                     |                                   |                        |
| Urban                                  |                     |                                   | Referent               |
| Nonurban                               |                     |                                   | 0.68 (0.24 to 1.90)    |
| <b>Teaching hospital</b>               |                     |                                   |                        |
| No                                     |                     |                                   | Referent               |
| Yes                                    |                     |                                   | 1.24 (0.67 to 2.28)    |
| <b>Married</b>                         |                     |                                   |                        |
| Yes                                    |                     |                                   | Referent               |
| No                                     |                     |                                   | 0.96 (0.58 to 1.60)    |
| Unknown                                |                     |                                   | 0.89 (0.12 to 6.64)    |

\* HR = hazard ratio; CI = confidence interval; AML = acute myelogenous leukemia; MDS = myelodysplastic syndrome; G-CSF = granulocyte colony-stimulating factor; GM-CSF = granulocyte–macrophage colony-stimulating factor; ER = estrogen receptor; PR = progesterone receptor.

† Stratified by year of diagnosis.

‡ Stratified by year of diagnosis and adjusted for clinical variables. All variables adjusted for others in the model.

§ Stratified by year of diagnosis and adjusted for clinical and demographic variables. All variables adjusted for others in the model.

agents have been found to have an increased risk of developing an MDS preleukemic condition characterized by unbalanced chromosomal alterations that is related to cumulative dose, after a

latency of 4 years (31). Patients treated with drugs that interact with topoisomerase, such as anthracyclines, are more likely to develop leukemia within 1–3 years; the leukemia lacks a preleukemic phase,

involves a balanced chromosomal aberration, and is not dose dependent (31). Both alkylating agents and anthracyclines are used frequently in the adjuvant treatment of breast cancer, and exposure to those agents may account for some of the increased risks of AML or MDS that we observed. (22,32–36).

In our study population, patients who received G-CSF were more likely than other patients to have been treated with radiation, doxorubicin, or cyclophosphamide, but in the Cox models, those treatments were not associated with an increased risk of AML or MDS. Patients in our sample who received radiation therapy had a 50% higher incidence of MDS and AML combined than other patients, but the association was not statistically significant. In the NSABP analysis of leukemia in patients who had received adjuvant doxorubicin and cyclophosphamide, patients who received radiation therapy were twice as likely to develop leukemia as those who had not (14). This difference in observed risks may have been due to differences in patient characteristics, such as age.

Others have found (7), as we observed in this study, that treatment with G-CSF is increasingly common among women with breast cancer. It is used to prevent complications from neutropenia (7), to improve quality of life, and to maintain dose and schedule (37–41). In 2003, among 2005 breast cancer patients in a randomized Cancer and Leukemia Group B (CALGB) trial, those who received dose-dense (every 2 weeks) chemotherapy with G-CSF support were reported to have better disease-free survival than patients who received therapy every 3 weeks without routine G-CSF support. (8). Since then, dose-dense therapy with G-CSF support has become the standard of care for node-positive breast cancer.

Among the 2005 relatively young (mean age = 50 years) participants in the CALGB trial (8), only 11 (0.5%) developed AML or MDS in 3 years of follow-up (for an incidence of 182.9/100000 person-years). The risk of MDS/AML was not higher in patients treated with dose-dense therapy with G-CSF than in patients treated on the 3-week arm, perhaps because patients in the 3-week arm were treated with G-CSF when indicated. Among the 5510 patients in our sample, with a mean age of 72 years, 64 (1.2%) developed MDS or AML with up to 12 years of follow-up (for an incidence of 193.3/100000 person-years).

Like all studies of the association between G-CSFs and leukemia, this study was limited by our inability to control for confounding by indication. The purpose of G-CSF is to support the marrow in patients treated with more intensive chemotherapy regimens. The more dose intensive the adjuvant therapy regimen, the higher the risk of secondary leukemia (14,42). Failure to recover marrow after exposure to chemotherapy is an indication for G-CSF, but such failure may also be a marker of marrow deficiency that may increase susceptibility to malignant transformation.

Even individuals without any history of malignancy may incur an increased risk of leukemia if treated with G-CSF (14–16,18, 19,42). Two peripheral blood stem cell donors were recently reported to have developed AML after G-CSF-primed harvests (19,20,43).

Patients with congenital neutropenia are prescribed G-CSF to prevent life-threatening infections (44). Among patients in two large registries, the Severe Chronic Neutropenia International

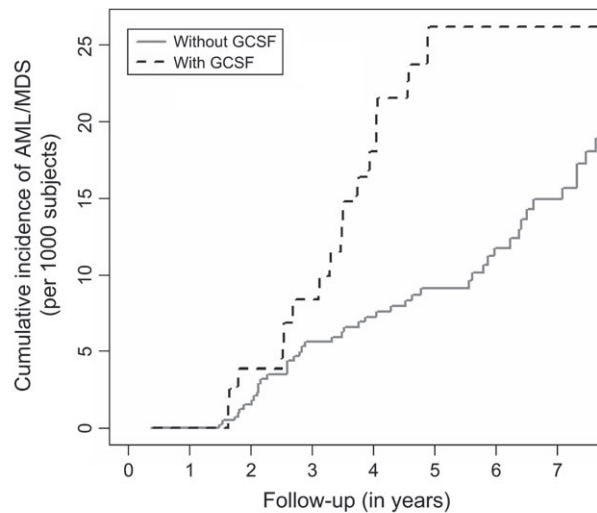

| No. of Pts at risk |      |                      |             |      |                      |             |      |      |
|--------------------|------|----------------------|-------------|------|----------------------|-------------|------|------|
| With GCSF          | 906  | 857                  | 726         | 646  | 587                  | 378         | 243  | 156  |
| Without GCSF       | 4604 | 4339                 | 3668        | 3213 | 2930                 | 2302        | 1751 | 1359 |
|                    |      | GCSF                 |             |      | Without GCSF         |             |      |      |
| Years              | N    | Incidence (per 1000) | 95% CI      | N    | Incidence (per 1000) | 95% CI      |      |      |
| 4                  | 587  | 18.0                 | (7.8-28.1)  | 2930 | 7.2                  | (4.4-10.0)  |      |      |
| 7                  | 156  | 26.2                 | (13.2-39.0) | 1359 | 14.9                 | (10.0-19.8) |      |      |

**Fig. 1.** Kaplan–Meier incidence curves for secondary acute myelogenous leukemia (AML) and myelodysplastic syndrome (MDS) among women treated with and without granulocyte colony-stimulating factor (G-CSF). **Dashed line** indicates G-CSF-treated patients; **solid line** indicates patients who did not receive G-CSF. At 4 years, the incidence of AML or MDS in patients treated with G-CSF was 18 per 1000 (95% confidence interval [CI] = 7.8 to 28.1); at 7 years, the incidence was 26.2 per 1000 (95% CI = 13.2 to 39.0). At 4 years, the incidence of leukemia or MDS in patients not treated with G-CSF was 7.2 per 1000 (95% CI = 4.4 to 10.0); at 7 years, the incidence was 14.9 per 1000 (95% CI = 10.0 to 19.8).

Registry and the French Severe Chronic Neutropenia Registry, those treated with G-CSF have been found to have higher risk of AML or MDS than those not treated (15,45,46). Risk of AML or MDS was associated with more severe neutropenia, younger age at diagnosis, and increased exposure to G-CSF (15). The risk was higher in patients who, because of poorer neutrophil responses to G-CSF, received G-CSF at higher doses or for a longer time (46). However, leukemia may also be part of the natural history of severe chronic neutropenia, such that it is not directly caused but rather uncovered by G-CSF because it reduces mortality from infections.

A strength of this study is its use of the SEER–Medicare database, an invaluable tool for studying unanticipated treatment effects and long-term outcomes in a population-based sample of patients who, for various reasons, have been underrepresented in clinical trials. Given the constraints on eligibility for such trials and other barriers to trial participation, the use of such databases is the only way to determine how treatments work in the real world. Our study extends the findings of clinical trial research conducted among younger women to elderly breast cancer patients, who may be at higher risk for treatment-related adverse outcomes. However, a limitation of the use of the database is that findings among such patients may not be generalizable to younger patients.

Despite the value of the SEER–Medicare database, it has some additional limitations. The SEER database consists of data



provided by hospital cancer registries based on patient charts. The Medicare database consists of reimbursement claims for medical care. Medicare claims data have not been validated, nor has SEER's sensitivity for second primary cancers diagnosed through ICD-9 claims. Our sensitivity analysis was motivated by concern that patients with only one AML or MDS claim might have been miscoded. Defining AML or MDS cases as those with at least two claims reduced the likelihood of misclassification and did not change the hazard ratio for the association between G-CSF and second primary AML or MDS.

Another major limitation of our study is that we could not measure dose and dose intensity for individual patients. However, adjusting for type of chemotherapy, duration of chemotherapy, radiation exposure, and stage of disease had a minimal effect on the overall hazard ratio; these results are reassuring because these variables are reasonable surrogates for dose and dose intensity.

In the past few years, the discovery of late toxic effects of a number of commonly used medications has raised serious concerns about the drug evaluation process (47–52). Unfortunately, many questions cannot be addressed in premarketing studies. A recent proposal calls for postmarketing studies of new drugs tailored to address the long-term issues associated with each new medication, including adequately powered safety studies, long-term studies of drugs for chronic diseases, epidemiologic investigations of rare adverse effects and special populations, and randomized trials that assess relative efficacy and clinical endpoints (52).

Our study demonstrates that the elevated risk of AML or MDS associated with adjuvant chemotherapy may be further increased by the concurrent use of growth factors. It is unclear if the growth factors cause an increased risk or if the requirements for their use cause an increased risk; however, the absolute overall risk appeared to be small, even among the elderly patients we studied. Nevertheless, if further research confirms this finding, this risk should be factored into clinical decisions with regard to the use of growth factors.

## References

- (1) Gulati SC, Bennett CL. Granulocyte-macrophage colony-stimulating factor (GM-CSF) as adjunct therapy in relapsed Hodgkin disease. *Ann Intern Med* 1992;116:177–82.
- (2) Lyman GH. Guidelines of the National Comprehensive Cancer Network on the use of myeloid growth factors with cancer chemotherapy: a review of the evidence. *J Natl Compr Canc Netw* 2005;3:557–71.
- (3) Sharma DC. Pegfilgrastim lowers side-effects of chemotherapy. *Lancet Oncol* 2004;5:461.
- (4) Dale DC, Bonilla MA, Davis MW, Nakanishi AM, Hammond WP, Kurtzberg J, et al. A randomized controlled phase III trial of recombinant human granulocyte colony-stimulating factor (filgrastim) for treatment of severe chronic neutropenia. *Blood* 1993;81:2496–502.
- (5) Nemunaitis J, Rabinow SN, Singer JW, Bierman PJ, Vose JM, Freedman AS, et al. Recombinant granulocyte-macrophage colony-stimulating factor after autologous bone marrow transplantation for lymphoid cancer. *N Engl J Med* 1991;324:1773–8.
- (6) Crawford J, Ozer H, Stoller R, Johnson D, Lyman G, Tabbara I, et al. Reduction by granulocyte colony-stimulating factor of fever and neutropenia induced by chemotherapy in patients with small-cell lung cancer. *N Engl J Med* 1991;325:164–70.
- (7) Du XL, Lairson DR, Begley CE, Fang S. Temporal and geographic variation in the use of hematopoietic growth factors in older women receiving breast cancer chemotherapy: findings from a large population-based cohort. *J Clin Oncol* 2005;23:8620–8.
- (8) Citron ML, Berry DA, Cirincione C, Hudis C, Winer EP, Gradishar WJ, et al. Randomized trial of dose-dense versus conventionally scheduled and sequential versus concurrent combination chemotherapy as postoperative adjuvant treatment of node-positive primary breast cancer: first report of intergroup trial C9741/cancer and leukemia group B trial 9741. *J Clin Oncol* 2003;21:1431–9.
- (9) Brodsky RA, Bedi A, Jones RJ. Are growth factors leukemogenic? *Leukemia* 1996;10:175–7.
- (10) Kaushansky K. Lineage-specific hematopoietic growth factors. *N Engl J Med* 2006;354:2034–45.
- (11) Shapira MY, Kaspler P, Samuel S, Shoshan S, Or R. Granulocyte colony stimulating factor does not induce long-term DNA instability in healthy peripheral blood stem cell donors. *Am J Hematol* 2003;73:33–6.
- (12) Kaplinsky C, Trakhtenbrot L, Hardan I, Reichart M, Daniely M, Toren A, et al. Tetraploid myeloid cells in donors of peripheral blood stem cells treated with rhG-CSF. *Bone Marrow Transplant* 2003;32:31–4.
- (13) Relling MV, Boyett JM, Blanco JG, Raimondi S, Behm FG, Sandlund JT, et al. Granulocyte colony-stimulating factor and the risk of secondary myeloid malignancy after etoposide treatment. *Blood* 2003;101:3862–7.
- (14) Smith RE, Bryant J, DeCillis A, Anderson S. Acute myeloid leukemia and myelodysplastic syndrome after doxorubicin-cyclophosphamide adjuvant therapy for operable breast cancer: the National Surgical Adjuvant Breast and Bowel Project Experience. *J Clin Oncol* 2003;21:1195–204.
- (15) Donadieu J, Leblanc T, Bader Meunier B, Barkaoui M, Fenneteau O, Bertrand Y, et al. Analysis of risk factors for myelodysplasias, leukemias and death from infection among patients with congenital neutropenia. Experience of the French Severe Chronic Neutropenia Study Group. *Haematologica* 2005;90:45–53.
- (16) Freedman MH, Alter BP. Malignant myeloid transformation in congenital forms of neutropenia. *Isr Med Assoc J* 2002;4:1011–4.
- (17) Dale DC, Cottle TE, Fier CJ, Bolyard AA, Bonilla MA, Boxer LA, et al. Severe chronic neutropenia: treatment and follow-up of patients in the Severe Chronic Neutropenia International Registry. *Am J Hematol* 2003;72:82–93.
- (18) Di Cosimo S, Ferretti G, Papaldo P, Carlini P, Fabi A, Ruggeri EM, et al. Does the concurrent use of anthracycline and granulocyte colony-stimulating factor influence the risk of secondary leukaemia in breast cancer women? *Ann Oncol* 2005;16:1209–10.
- (19) Makita K, Ohta K, Mugitani A, Hagihara K, Ohta T, Yamane T, et al. Acute myelogenous leukemia in a donor after granulocyte colony-stimulating factor-primed peripheral blood stem cell harvest. *Bone Marrow Transplant* 2004;33:661–5.
- (20) Bennett CL, Nebeker JR, Lyons EA, Samore MH, Feldman MD, McKoy JM, et al. The Research on Adverse Drug Events and Reports (RADAR) project. *JAMA* 2005;293:2131–40.
- (21) Imashuku S, Hibi S, Bessho F, Tsuchida M, Nakahata T, Miyazaki S, et al. Detection of myelodysplastic syndrome/acute myeloid leukemia evolving from aplastic anemia in children, treated with recombinant human G-CSF. *Haematologica* 2003;88:ECR31.
- (22) Dombret H, Chastang C, Fenaux P, Reiffers J, Bordessoule D, Bouabdallah R, et al. A controlled study of recombinant human granulocyte colony-stimulating factor in elderly patients after treatment for acute myelogenous leukemia. AML Cooperative Study Group. *N Engl J Med* 1995;332:1678–83.
- (23) Early Breast Cancer Trialists' Collaborative Group. Effects of chemotherapy and hormonal therapy for early breast cancer on recurrence and 15-year survival: an overview of the randomised trials. *Lancet* 2005;365:1687–717.
- (24) Warren JL, Klabunde CN, Schrag D, Bach PB, Riley GF. Overview of the SEER-Medicare data: content, research applications, and generalizability to the United States elderly population. *Med Care* 2002;40:Suppl IV3–18.
- (25) Manual for staging of cancer, version 6. New York (NY): Springer-Verlag; 2003.
- (26) Warren JL, Harlan LC, Fahey A, Virnig BA, Freeman JL, Klabunde CN, et al. Utility of the SEER-Medicare data to identify chemotherapy use. *Med Care* 2002;40:Suppl IV55–61.
- (27) Charlson ME, Pompei P, Ales KL, Mackenzie CR. A new method of classifying prognostic comorbidity in longitudinal studies: development and validation. *J Chronic Dis* 1986;40:373–83.

- (28) Klabunde CN, Potosky AL, Legler JM, Warren JL. Development of a comorbidity index using physician claims data. *J Clin Epidemiol* 2000;53:1258–67.
- (29) Extermann M, Overcash J, Lyman GH, Parr J, Balducci L. Comorbidity and functional status are independent in older cancer patients. *J Clin Oncol* 1998;16:1582–7.
- (30) Du XL, Osborne C, Goodwin JS. Population-based assessment of hospitalizations for toxicity from chemotherapy in older women with breast cancer. *J Clin Oncol* 2002;20:4636–42.
- (31) Pedersen-Bjergaard J, Philip P. Two different classes of therapy-related and de-novo acute myeloid leukemia? *Cancer Genet Cytogenet* 1991; 55:119–24.
- (32) Lieschke GJ, Burgess AW. Granulocyte colony-stimulating factor and granulocyte-macrophage colony-stimulating factor (2). *N Engl J Med* 1992;327:99–106.
- (33) Metcalf D. The colony stimulating factors. Discovery, development, and clinical applications. *Cancer* 1990;65:2185–95.
- (34) Kojima S, Tsuchida M, Matsuyama T. Myelodysplasia and leukemia after treatment of aplastic anemia with G-CSF. *N Engl J Med* 1992; 326:1294–5.
- (35) Godwin JE, Kopecky KJ, Head DR, Willman CL, Leith CP, Hynes HE, et al. A double-blind placebo-controlled trial of granulocyte colony-stimulating factor in elderly patients with previously untreated acute myeloid leukemia: a Southwest oncology group study (9031). *Blood* 1998;91:3607–15.
- (36) Heil G, Hoelzer D, Sanz MA, Lechner K, Liu Yin JA, Papa G, et al. A randomized, double-blind, placebo-controlled, phase III study of filgrastim in remission induction and consolidation therapy for adults with de novo acute myeloid leukemia. The International Acute Myeloid Leukemia Study Group. *Blood* 1997;90:4710–8.
- (37) Growth factor allows effective dose-intensive regimen in advanced breast cancer patients. *Oncology (Williston Park)* 1995;9:684.
- (38) Webster J, Lyman GH. Use of G-CSF to sustain dose intensity in breast cancer patients receiving adjuvant chemotherapy: a pilot study. *Cancer Control* 1996;3:519–23.
- (39) Frasci G. Treatment of breast cancer with chemotherapy in combination with filgrastim: approaches to improving therapeutic outcome. *Drugs* 2002; 62:Suppl. 117–31.
- (40) Norton L, Simon R. Growth curve of an experimental solid tumor following radiotherapy. *J Natl Cancer Inst* 1977;58:1735–41.
- (41) Norton L, Simon R, Brereton HD, Bogden AE. Predicting the course of Gompertzian growth. *Nature* 1976;264:542–5.
- (42) Praga C, Bergh J, Bliss J, Bonnetterre J, Cesana B, Coombes RC, et al. Risk of acute myeloid leukemia and myelodysplastic syndrome in trials of adjuvant epirubicin for early breast cancer: correlation with doses of epirubicin and cyclophosphamide. *J Clin Oncol* 2005;23:4179–91.
- (43) Bennett CL, Evens AM, Andritsos LA, Balasubramanian L, Mai M, Fisher MJ, et al. Haematological malignancies developing in previously healthy individuals who received haematopoietic growth factors: report from the Research on Adverse Drug Events and Reports (RADAR) project. *Br J Haematol* 2006;135:642–50.
- (44) Bonilla MA, Gillio AP, Ruggerio M, Kernan NA, Brochstein JA, Abboud M, et al. Effects of recombinant human granulocyte colony-stimulating factor on neutropenia in patients with congenital agranulocytosis. *N Engl J Med* 1989;320:1574–80.
- (45) Freedman MH, Bonilla MA, Fier C, Bolyard AA, Scarlata D, Boxer LA, et al. Myelodysplasia syndrome and acute myeloid leukemia in patients with congenital neutropenia receiving G-CSF therapy. *Blood* 2000;96:429–36.
- (46) Rosenberg PS, Alter BP, Bolyard AA, Bonilla MA, Boxer LA, Cham B, et al. The incidence of leukemia and mortality from sepsis in patients with severe congenital neutropenia receiving long-term G-CSF therapy. *Blood* 2006;107:4628–35.
- (47) Park-Wyllie LY, Juurlink DN, Kopp A, Shah BR, Stukel TA, Stumpo C, et al. Outpatient gatifloxacin therapy and dysglycemia in older adults. *N Engl J Med* 2006;354:1352–61.
- (48) Couzin J. Scientific publishing. Echoing other cases, NEJM says Vioxx Safety data withheld. *Science* 2005;310:1755.
- (49) Waxman HA. The lessons of Vioxx—drug safety and sales. *N Engl J Med* 2005;352:2576–8.
- (50) Griffin MR, Stein CM, Ray WA. Postmarketing surveillance for drug safety: surely we can do better. *Clin Pharmacol Ther* 2004;75:491–4.
- (51) Ray WA, Murray KT, Meredith S, Narasimhulu SS, Hall K, Stein CM. Oral erythromycin and the risk of sudden death from cardiac causes. *N Engl J Med* 2004;351:1089–96.
- (52) Ray WA, Stein CM. Reform of drug regulation—beyond an independent drug-safety board. *N Engl J Med* 2006;354:194–201.

## Notes

D. Hershman is the recipient of an American Society of Clinical Oncology Career Development Award and a K07 Award from the National Cancer Institute (NCI) (CA95597). A. I. Neugut is the recipient of a K05 Award from the NCI (CA89155) and a grant from the American Cancer Society (RSGT-01-024-04-CPHPS). V. R. Grann is the recipient of a grant from the American Cancer Society (RSGHP PBP-105710). C. L. Bennett is supported, in part, from grants from the NCI (1R01CA 102713-01 and P30 CA60553).

The funding agencies had no input in the design, collection, analysis, interpretation of the data, writing of the manuscript, or decision to submit the manuscript for publication. C. L. Bennett is a consultant for AMGEN, which did not fund this project and had no involvement in this study.

This study used the linked SEER–Medicare database. The interpretation and reporting of these data are the sole responsibility of the authors. The authors thank the Applied Research Branch, Division of Cancer Prevention, NCI; the Office of Information Services and the Office of Strategic Planning, CMS; Information Management Services, Inc; and the SEER program tumor registries for creating the SEER–Medicare database.

Manuscript received May 20, 2006; revised November 15, 2006; accepted December 5, 2006.
